# Supplementary material for: Comparison between one and two-dimensional liquid chromatographic approaches for the determination of plasmatic stroke biomarkers by isotope dilution and tandem mass spectrometry
Source: Royal Society of Chemistry journal article supplement (doi:10.1039/d2an01750d), 2022-12-16

**ELECTRONIC SUPPORTING INFORMATION.**

**COMPARISON BETWEEN ONE AND TWO-DIMENSIONAL LIQUID CHROMATOGRAPHIC APPROACHES FOR THE DETERMINATION OF PLASMATIC STROKE BIOMARKERS BY ISOTOPE DILUTION AND TANDEM MASS SPECTROMETRY**

Adela Cortés Giménez-Coral<sup>a,b</sup>, Pablo Rodríguez González<sup>a\*</sup>, Adriana González Gago<sup>a</sup>, Eva Cernuda Morollón<sup>b</sup>, Elena Lopez-Cancio<sup>c</sup>, Belén Prieto García<sup>b</sup>, J. Ignacio García Alonso<sup>a</sup>

<sup>a</sup> Department of Physical and Analytical Chemistry. Faculty of Chemistry. University of Oviedo, 33006 Oviedo, Spain.

<sup>b</sup> Clinical Biochemistry, Laboratory of Medicine, Central University Hospital of Asturias, Oviedo, 33011, Spain

<sup>c</sup> Department of Neurology, Central University Hospital of Asturias, 33011 Oviedo, Spain

\*Author for correspondence: [rodriguezpablo@uniovi.es](mailto:rodriguezpablo@uniovi.es)

Number of pages 10

Number of Tables: 9

Number of Figure: 7

**Figure S1.** Comparison of the theoretical and experimental isotopologue distributions obtained by LC-MS/MS using the SRM mode for the natural abundance and labelled analogues of a) L-Arginine, b) ADMA and c) SDMA. The theoretical isotopic distributions were obtained according to reference [\*\*]. The uncertainty of the experimental values represents the 1s standard deviation of n = 6 LC-MS/MS injections.

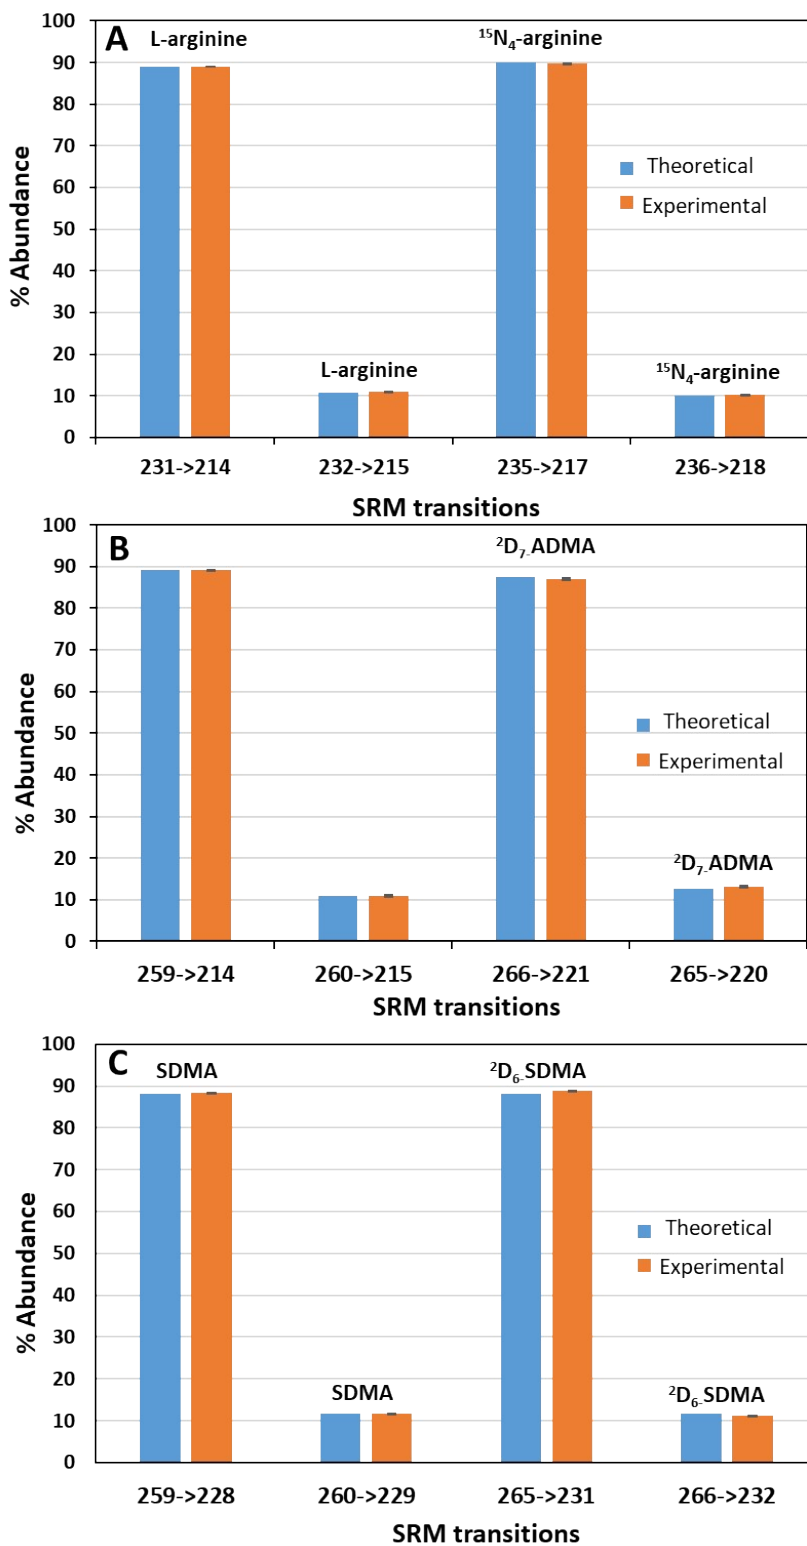

**Figure S2.** 1D-HPLC-UV chromatogram of a standard solution containing 400  $\mu\text{g g}^{-1}$  of L-Arg, 300  $\mu\text{g g}^{-1}$  of ADMA and 200  $\mu\text{g g}^{-1}$  of SDMA using 1% HFBA in water and acetonitrile (mobile phases A and B, respectively).

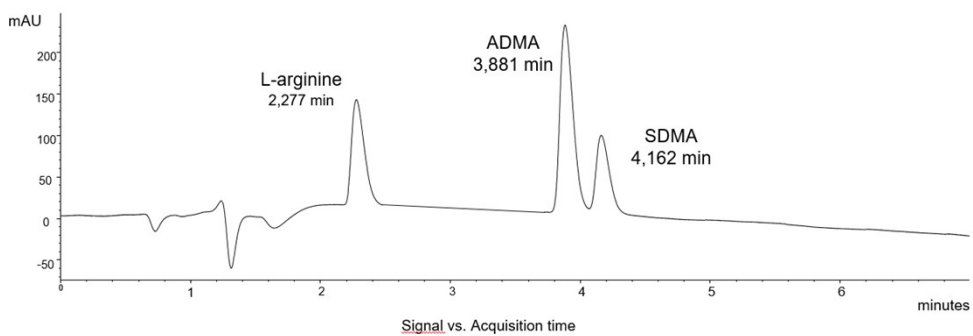

**Figure S3.** Peak area for L-Arg, ADMA and SDMA in a pooled plasma by 2D-HPLC-MS/MS obtained at injection volumes from 0.5 to 5  $\mu\text{L}$ .

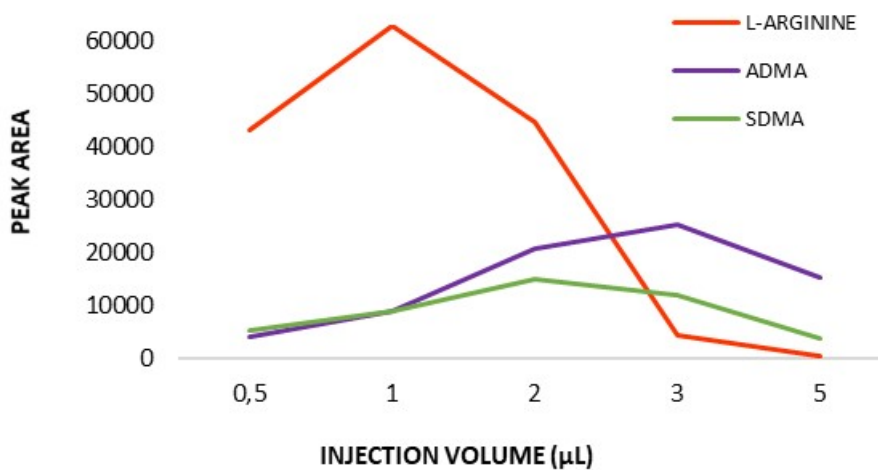

**Table S1.** Added concentration, experimental concentration, and recovery for L-Arg obtained by 2D-HPLC-MS/MS in a pooled plasma fortified with known amounts of the natural abundance L-Arg at 3 concentration levels obtained in two different measurement days. Uncertainty of the individual recovery values is expressed as the standard deviation of n=3 independent injections into the 2D-HPLC-MS/MS.

| L-Arginine by 2D-HPLC-MS/MS |                 |           |                                              |                                              |                  |
|-----------------------------|-----------------|-----------|----------------------------------------------|----------------------------------------------|------------------|
| Level                       | Measurement Day | Replicate | Added Concentration ( $\mu\text{g g}^{-1}$ ) | Found concentration ( $\mu\text{g g}^{-1}$ ) | % Recovery       |
| 1                           | 1               | 1         | 7.89                                         | $7.59 \pm 0.04$                              | $96.23 \pm 0.47$ |
|                             |                 | 2         | 7.76                                         | $7.51 \pm 0.10$                              | $96.74 \pm 1.25$ |
|                             |                 | 3         | 7.89                                         | $7.78 \pm 0.13$                              | $98.58 \pm 1.59$ |
|                             | 2               | 4         | 7.74                                         | $7.46 \pm 0.17$                              | $96.46 \pm 2.26$ |
|                             |                 | 5         | 8.53                                         | $8.11 \pm 0.27$                              | $95.14 \pm 3.17$ |
|                             |                 | 6         | 8.09                                         | $7.67 \pm 0.06$                              | $94.84 \pm 0.79$ |
| 2                           | 1               | 1         | 15.81                                        | $15.78 \pm 0.59$                             | $99.81 \pm 3.75$ |
|                             |                 | 2         | 15.60                                        | $15.46 \pm 0.13$                             | $99.12 \pm 0.83$ |
|                             |                 | 3         | 15.66                                        | $15.52 \pm 0.21$                             | $99.08 \pm 1.33$ |
|                             | 2               | 4         | 15.54                                        | $15.08 \pm 0.31$                             | $97.02 \pm 2.00$ |
|                             |                 | 5         | 15.83                                        | $15.13 \pm 0.22$                             | $95.56 \pm 1.40$ |
|                             |                 | 6         | 15.87                                        | $14.95 \pm 0.24$                             | $94.23 \pm 1.54$ |
| 3                           | 1               | 1         | 32.05                                        | $31.36 \pm 0.21$                             | $97.84 \pm 0.65$ |
|                             |                 | 2         | 31.91                                        | $30.37 \pm 0.25$                             | $98.31 \pm 0.79$ |
|                             |                 | 3         | 31.23                                        | $30.67 \pm 0.05$                             | $98.22 \pm 0.17$ |
|                             | 2               | 4         | 31.46                                        | $29.99 \pm 0.52$                             | $95.33 \pm 1.64$ |
|                             |                 | 5         | 31.51                                        | $29.36 \pm 0.18$                             | $93.16 \pm 0.58$ |
|                             |                 | 6         | 31.52                                        | $29.66 \pm 1.14$                             | $94.09 \pm 3.63$ |

**Table S2.** Added concentration, experimental concentration, and recovery for ADMA obtained by 2D-HPLC-MS/MS in a pooled plasma fortified with known amounts of the natural abundance L-Arg at 3 concentration levels obtained in two different measurement days. Uncertainty of the individual recovery values is expressed as the standard deviation of n=3 independent injections into the 2D-HPLC-MS/MS.

| ADMA by 2D-HPLC-MS/MS |                 |           |                                              |                                              |                    |
|-----------------------|-----------------|-----------|----------------------------------------------|----------------------------------------------|--------------------|
| Level                 | Measurement Day | Replicate | Added Concentration ( $\mu\text{g g}^{-1}$ ) | Found concentration ( $\mu\text{g g}^{-1}$ ) | % Recovery         |
| 1                     | 1               | 1         | 0.18                                         | $0.20 \pm 0.03$                              | $110.63 \pm 18.20$ |
|                       |                 | 2         | 0.18                                         | $0.27 \pm 0.01$                              | $153.58 \pm 4.85$  |
|                       |                 | 3         | 0.18                                         | $0.22 \pm 0.00$                              | $120.28 \pm 1.72$  |
|                       | 2               | 4         | 0.17                                         | $0.47 \pm 0.00$                              | $268.33 \pm 2.28$  |
|                       |                 | 5         | 0.19                                         | $0.50 \pm 0.01$                              | $257.98 \pm 5.22$  |
|                       |                 | 6         | 0.18                                         | $0.48 \pm 0.01$                              | $260.60 \pm 3.30$  |
| 2                     | 1               | 1         | 0.36                                         | $0.37 \pm 0.06$                              | $103.34 \pm 17.85$ |
|                       |                 | 2         | 0.36                                         | $0.50 \pm 0.03$                              | $140.71 \pm 7.37$  |
|                       |                 | 3         | 0.36                                         | $0.55 \pm 0.02$                              | $154.09 \pm 4.56$  |
|                       | 2               | 4         | 0.35                                         | $0.77 \pm 0.02$                              | $220.22 \pm 4.55$  |
|                       |                 | 5         | 0.36                                         | $0.98 \pm 0.01$                              | $218.82 \pm 4.15$  |
|                       |                 | 6         | 0.36                                         | $0.78 \pm 0.04$                              | $218.40 \pm 9.85$  |
| 3                     | 1               | 1         | 0.73                                         | $0.96 \pm 0.02$                              | $130.56 \pm 2.47$  |
|                       |                 | 2         | 0.73                                         | $0.98 \pm 0.04$                              | $134.61 \pm 4.89$  |
|                       |                 | 3         | 0.71                                         | $0.68 \pm 0.01$                              | $95.92 \pm 2.09$   |
|                       | 2               | 4         | 0.71                                         | $1.45 \pm 0.08$                              | $203.92 \pm 11.47$ |
|                       |                 | 5         | 0.71                                         | $1.49 \pm 0.05$                              | $210.13 \pm 7.69$  |
|                       |                 | 6         | 0.71                                         | $1.52 \pm 0.08$                              | $213.29 \pm 10.98$ |

**Table S3.** Added concentration, experimental concentration, and recovery for SDMA obtained by 2D-HPLC-MS/MS in a pooled plasma fortified with known amounts of the natural abundance L-Arg at 3 concentration levels obtained in two different measurement days. Uncertainty of the individual recovery values is expressed as the standard deviation of n=3 independent injections into the 2D-HPLC-MS/MS.

| SDMA by 2D-HPLC MS/MS |                 |           |                                              |                                              |                   |
|-----------------------|-----------------|-----------|----------------------------------------------|----------------------------------------------|-------------------|
| Level                 | Measurement Day | Replicate | Added Concentration ( $\mu\text{g g}^{-1}$ ) | Found concentration ( $\mu\text{g g}^{-1}$ ) | % Recovery        |
| 1                     | 1               | 1         | 0.65                                         | $1.12 \pm 0.04$                              | $170.51 \pm 6.03$ |
|                       |                 | 2         | 0.64                                         | $1.13 \pm 0.02$                              | $174.78 \pm 2.68$ |
|                       |                 | 3         | 0.65                                         | $1.09 \pm 0.03$                              | $166.45 \pm 2.23$ |
|                       | 2               | 4         | 0.66                                         | $1.22 \pm 0.02$                              | $184.46 \pm 2.58$ |
|                       |                 | 5         | 0.73                                         | $1.34 \pm 0.02$                              | $185.08 \pm 3.06$ |
|                       |                 | 6         | 0.69                                         | $1.24 \pm 0.03$                              | $180.44 \pm 4.19$ |
| Level 2               | 1               | 1         | 1.31                                         | $2.17 \pm 0.06$                              | $165.67 \pm 4.90$ |
|                       |                 | 2         | 1.29                                         | $2.22 \pm 0.01$                              | $171.38 \pm 0.47$ |
|                       |                 | 3         | 1.30                                         | $2.24 \pm 0.03$                              | $172.35 \pm 2.01$ |
|                       | 2               | 4         | 1.32                                         | $2.17 \pm 0.03$                              | $163.63 \pm 1.98$ |
|                       |                 | 5         | 1.35                                         | $2.28 \pm 0.02$                              | $168.92 \pm 1.45$ |
|                       |                 | 6         | 1.35                                         | $2.31 \pm 0.03$                              | $170.86 \pm 2.33$ |
| Level 3               | 1               | 1         | 2.66                                         | $4.33 \pm 0.03$                              | $162.73 \pm 0.96$ |
|                       |                 | 2         | 2.65                                         | $4.33 \pm 0.03$                              | $163.56 \pm 1.08$ |
|                       |                 | 3         | 2.59                                         | $3.73 \pm 0.05$                              | $143.98 \pm 1.94$ |
|                       | 2               | 4         | 2.68                                         | $4.57 \pm 0.04$                              | $170.69 \pm 1.59$ |
|                       |                 | 5         | 2.68                                         | $4.67 \pm 0.09$                              | $173.85 \pm 3.50$ |
|                       |                 | 6         | 2.68                                         | $4.78 \pm 0.19$                              | $177.95 \pm 6.91$ |

**Figure S4.** Comparison of the peak area obtained for the most abundant SRM transition of natural abundance L-Arginine, ADMA and SDMA 1D-HPLC-MS/MS and 2D-HPLC-MS/MS.

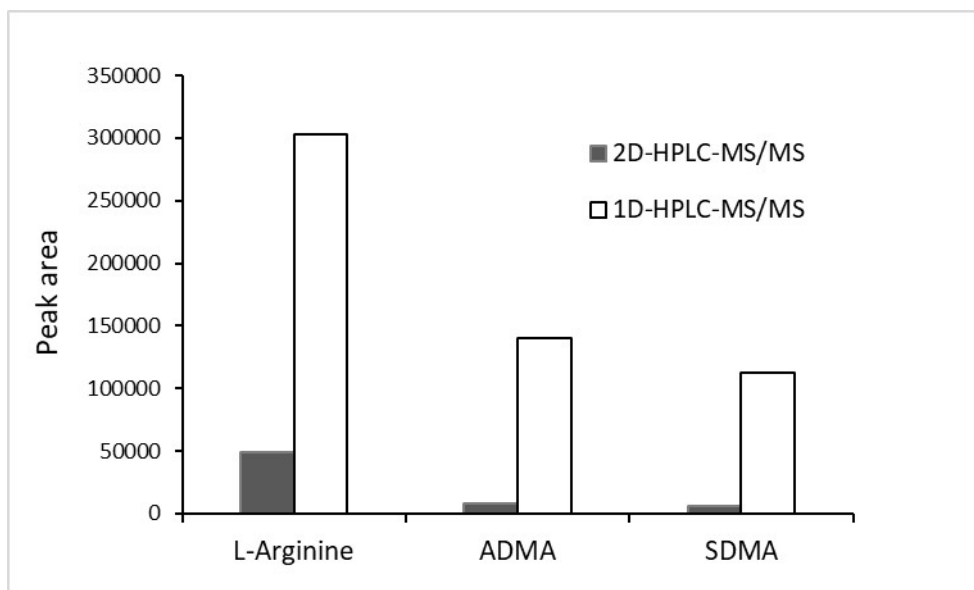

**Table S4.** Added concentration, experimental concentration and recovery for L-Arg in a pooled plasma enriched with a known amount of the natural abundance analytes to achieve 3 concentration levels measured by 1D-HPLC-MS/MS. This recovery experiment was carried out in four days and n=3 independent replicates were measured in triplicate. Uncertainty of the values correspond to the standard deviation obtained from n=3 independent injections.

| L-Arginine by 1D-HPLC-MS/MS |                 |           |                                              |                                              |                    |
|-----------------------------|-----------------|-----------|----------------------------------------------|----------------------------------------------|--------------------|
| Level                       | Measurement Day | Replicate | Added Concentration ( $\mu\text{g g}^{-1}$ ) | Found concentration ( $\mu\text{g g}^{-1}$ ) | % Recovery         |
| 1                           | 1               | 1         | 7.92                                         | $8.04 \pm 0.05$                              | $101.56 \pm 0.69$  |
|                             |                 | 2         | 8.15                                         | $8.33 \pm 0.04$                              | $102.19 \pm 0.46$  |
|                             |                 | 3         | 7.72                                         | $7.81 \pm 0.04$                              | $101.26 \pm 0.56$  |
|                             | 2               | 4         | 8.34                                         | $8.47 \pm 0.03$                              | $101.55 \pm 0.31$  |
|                             |                 | 5         | 7.31                                         | $8.41 \pm 0.04$                              | $101.31 \pm 0.55$  |
|                             |                 | 6         | 7.29                                         | $7.40 \pm 0.04$                              | $101.51 \pm 0.51$  |
|                             | 3               | 7         | 8.52                                         | $8.72 \pm 0.03$                              | $101.31 \pm 0.33$  |
|                             |                 | 8         | 8.18                                         | $8.26 \pm 0.03$                              | $100.97 \pm 0.32$  |
|                             |                 | 9         | 8.50                                         | $8.87 \pm 0.04$                              | $104.37 \pm 0.47$  |
|                             | 4               | 10        | 8.32                                         | $7.87 \pm 0.14$                              | $94.54 \pm 1.69$   |
|                             |                 | 11        | 8.34                                         | $7.98 \pm 0.11$                              | $95.69 \pm 1.37$   |
|                             |                 | 12        | 8.22                                         | $8.73 \pm 0.06$                              | $106.23 \pm 0.70$  |
| 2                           | 1               | 1         | 16.06                                        | $16.44 \pm 0.09$                             | $102.32 \pm 0.53$  |
|                             |                 | 2         | 15.69                                        | $15.70 \pm 0.64$                             | $100.09 \pm 4.10$  |
|                             |                 | 3         | 16.28                                        | $16.63 \pm 0.09$                             | $102.17 \pm 0.53$  |
|                             | 2               | 4         | 16.92                                        | $16.71 \pm 0.03$                             | $98.75 \pm 0.20$   |
|                             |                 | 5         | 16.41                                        | $16.46 \pm 0.15$                             | $100.27 \pm 0.89$  |
|                             |                 | 6         | 16.78                                        | $16.77 \pm 0.02$                             | $99.94 \pm 0.13$   |
|                             | 3               | 7         | 16.06                                        | $16.13 \pm 0.08$                             | $100.44 \pm 0.51$  |
|                             |                 | 8         | 14.25                                        | $15.49 \pm 1.75$                             | $108.75 \pm 12.29$ |
|                             |                 | 9         | 15.72                                        | $16.08 \pm 0.06$                             | $102.25 \pm 0.36$  |
|                             | 4               | 10        | 16.50                                        | $16.74 \pm 0.07$                             | $101.42 \pm 0.43$  |
|                             |                 | 11        | 14.22                                        | $18.30 \pm 0.69$                             | $128.62 \pm 4.83$  |
|                             |                 | 12        | 15.96                                        | $16.94 \pm 0.07$                             | $106.11 \pm 0.44$  |
| 3                           | 1               | 1         | 32.03                                        | $32.62 \pm 0.14$                             | $101.82 \pm 0.45$  |
|                             |                 | 2         | 32.30                                        | $33.05 \pm 0.07$                             | $102.32 \pm 0.22$  |
|                             |                 | 3         | 32.20                                        | $33.00 \pm 0.15$                             | $102.50 \pm 0.45$  |
|                             | 2               | 4         | 32.23                                        | $32.10 \pm 0.04$                             | $99.61 \pm 0.13$   |
|                             |                 | 5         | 32.25                                        | $33.14 \pm 0.08$                             | $102.75 \pm 0.25$  |
|                             |                 | 6         | 31.99                                        | $32.68 \pm 0.04$                             | $102.17 \pm 0.13$  |

|   |    |       |              |               |
|---|----|-------|--------------|---------------|
| 3 | 7  | 34.07 | 36.30 ± 0.05 | 106.55 ± 0.14 |
|   | 8  | 32.95 | 34.78 ± 0.29 | 105.55 ± 0.88 |
|   | 9  | 31.86 | 33.28 ± 0.04 | 104.47 ± 0.14 |
| 4 | 10 | 33.11 | 34.52 ± 0.11 | 104.26 ± 0.34 |
|   | 11 | 32.48 | 34.18 ± 0.06 | 105.23 ± 0.19 |
|   | 12 | 33.24 | 34.40 ± 0.11 | 103.51 ± 0.34 |

**Table S5.** Added concentration, experimental concentration and recovery for ADMA in a pooled plasma enriched with a known amount of the natural abundance analytes to achieve 3 concentration levels measured by 1D-HPLC-MS/MS. This recovery experiment was carried out in four days and n=3 independent replicates were measured in triplicate. Uncertainty of the values correspond to the standard deviation obtained from n=3 independent injections.

| ADMA by 1D-HPLC-MS/MS |                 |           |                                              |                                              |               |
|-----------------------|-----------------|-----------|----------------------------------------------|----------------------------------------------|---------------|
| Level                 | Measurement Day | Replicate | Added Concentration ( $\mu\text{g g}^{-1}$ ) | Found concentration ( $\mu\text{g g}^{-1}$ ) | % Recovery    |
| 1                     | 1               | 1         | 0.19                                         | 0.20 ± 0.00                                  | 104.16 ± 1.16 |
|                       |                 | 2         | 0.20                                         | 0.21 ± 0.01                                  | 105.84 ± 3.24 |
|                       |                 | 3         | 0.19                                         | 0.20 ± 0.00                                  | 104.54 ± 1.59 |
|                       | 2               | 4         | 0.19                                         | 0.20 ± 0.00                                  | 104.31 ± 0.54 |
|                       |                 | 5         | 0.17                                         | 0.17 ± 0.00                                  | 102.71 ± 1.02 |
|                       |                 | 6         | 0.17                                         | 0.17 ± 0.00                                  | 103.94 ± 0.78 |
|                       | 3               | 7         | 0.20                                         | 0.21 ± 0.01                                  | 103.24 ± 4.01 |
|                       |                 | 8         | 0.19                                         | 0.19 ± 0.00                                  | 98.32 ± 1.41  |
|                       |                 | 9         | 0.20                                         | 0.21 ± 0.00                                  | 105.91 ± 1.72 |
|                       | 4               | 10        | 0.20                                         | 0.19 ± 0.00                                  | 96.62 ± 1.90  |
|                       |                 | 11        | 0.20                                         | 0.19 ± 0.00                                  | 96.95 ± 1.85  |
|                       |                 | 12        | 0.20                                         | 0.21 ± 0.00                                  | 109.17 ± 0.71 |
| 2                     | 1               | 1         | 0.39                                         | 0.41 ± 0.00                                  | 105.41 ± 1.03 |
|                       |                 | 2         | 0.38                                         | 0.40 ± 0.00                                  | 105.25 ± 0.98 |
|                       |                 | 3         | 0.39                                         | 0.42 ± 0.01                                  | 105.11 ± 2.14 |
|                       | 2               | 4         | 0.39                                         | 0.40 ± 0.00                                  | 102.73 ± 1.24 |
|                       |                 | 5         | 0.38                                         | 0.40 ± 0.01                                  | 105.14 ± 1.54 |
|                       |                 | 6         | 0.39                                         | 0.40 ± 0.00                                  | 103.90 ± 1.02 |
|                       | 3               | 7         | 0.38                                         | 0.39 ± 0.00                                  | 102.28 ± 1.15 |
|                       |                 | 8         | 0.34                                         | 0.36 ± 0.00                                  | 105.02 ± 0.04 |
|                       |                 | 9         | 0.37                                         | 0.39 ± 0.00                                  | 105.11 ± 1.13 |
|                       | 4               | 10        | 0.39                                         | 0.42 ± 0.00                                  | 106.72 ± 0.68 |
|                       |                 | 11        | 0.34                                         | 0.44 ± 0.00                                  | 130.07 ± 0.56 |
|                       |                 | 12        | 0.38                                         | 0.42 ± 0.00                                  | 110.35 ± 0.41 |
| 3                     | 1               | 1         | 0.78                                         | 0.80 ± 0.00                                  | 103.52 ± 0.30 |
|                       |                 | 2         | 0.78                                         | 0.82 ± 0.00                                  | 104.43 ± 0.47 |
|                       |                 | 3         | 0.78                                         | 0.82 ± 0.01                                  | 104.87 ± 1.64 |
|                       | 2               | 4         | 0.74                                         | 0.78 ± 0.01                                  | 105.93 ± 1.10 |
|                       |                 | 5         | 0.74                                         | 0.80 ± 0.01                                  | 108.16 ± 0.69 |
|                       |                 | 6         | 0.73                                         | 0.79 ± 0.01                                  | 107.57 ± 1.06 |
|                       | 3               | 7         | 0.81                                         | 0.84 ± 0.00                                  | 104.24 ± 0.36 |

|  |   |    |      |             |               |
|--|---|----|------|-------------|---------------|
|  | 4 | 8  | 0.78 | 0.83 ± 0.00 | 105.54 ± 0.45 |
|  |   | 9  | 0.76 | 0.79 ± 0.00 | 104.67 ± 0.26 |
|  |   | 10 | 0.79 | 0.84 ± 0.01 | 107.08 ± 0.67 |
|  |   | 11 | 0.77 | 0.80 ± 0.01 | 103.36 ± 0.73 |
|  |   | 12 | 0.79 | 0.83 ± 0.00 | 105.05 ± 0.42 |

**Table S6.** Added concentration, experimental concentration and recovery for SDMA in a pooled plasma enriched with a known amount of the natural abundance analytes to achieve 3 concentration levels measured by 1D-HPLC-MS/MS. This recovery experiment was carried out in four days and n=3 independent replicates were measured in triplicate. Uncertainty of the values correspond to the standard deviation obtained from n=3 independent injections.

| SDMA by 1D-HPLC- MS/MS |                 |           |                                              |                                              |               |
|------------------------|-----------------|-----------|----------------------------------------------|----------------------------------------------|---------------|
|                        | Measurement Day | Replicate | Added Concentration ( $\mu\text{g g}^{-1}$ ) | Found concentration ( $\mu\text{g g}^{-1}$ ) | % Recovery    |
| Level 1                | 1               | 1         | 0.64                                         | 0.63 ± 0.01                                  | 98.45 ± 1.36  |
|                        |                 | 2         | 0.66                                         | 0.66 ± 0.00                                  | 99.62 ± 0.35  |
|                        |                 | 3         | 0.62                                         | 0.63 ± 0.00                                  | 100.83 ± 0.55 |
|                        | 2               | 4         | 0.61                                         | 0.60 ± 0.00                                  | 98.74 ± 0.21  |
|                        |                 | 5         | 0.54                                         | 0.52 ± 0.00                                  | 96.93 ± 0.92  |
|                        |                 | 6         | 0.53                                         | 0.53 ± 0.01                                  | 99.01 ± 1.11  |
|                        | 3               | 7         | 0.66                                         | 0.66 ± 0.00                                  | 99.39 ± 0.73  |
|                        |                 | 8         | 0.63                                         | 0.62 ± 0.00                                  | 98.44 ± 0.56  |
|                        |                 | 9         | 0.66                                         | 0.66 ± 0.00                                  | 100.60 ± 0.75 |
|                        | 4               | 10        | 0.64                                         | 0.64 ± 0.00                                  | 98.92 ± 0.21  |
|                        |                 | 11        | 0.64                                         | 0.64 ± 0.00                                  | 99.63 ± 0.76  |
|                        |                 | 12        | 0.64                                         | 0.65 ± 0.00                                  | 102.41 ± 0.60 |
| Level 2                | 1               | 1         | 1.30                                         | 1.27 ± 0.00                                  | 98.12 ± 0.10  |
|                        |                 | 2         | 1.27                                         | 1.26 ± 0.01                                  | 99.19 ± 0.62  |
|                        |                 | 3         | 1.32                                         | 1.29 ± 0.00                                  | 98.28 ± 0.18  |
|                        | 2               | 4         | 1.24                                         | 1.30 ± 0.01                                  | 104.60 ± 0.42 |
|                        |                 | 5         | 1.20                                         | 1.27 ± 0.01                                  | 105.32 ± 0.43 |
|                        |                 | 6         | 1.23                                         | 1.29 ± 0.01                                  | 104.59 ± 0.78 |
|                        | 3               | 7         | 1.24                                         | 1.26 ± 0.00                                  | 101.77 ± 0.33 |
|                        |                 | 8         | 1.10                                         | 1.14 ± 0.00                                  | 103.38 ± 0.15 |
|                        |                 | 9         | 1.22                                         | 1.23 ± 0.01                                  | 101.38 ± 0.60 |
|                        | 4               | 10        | 1.28                                         | 1.26 ± 0.01                                  | 98.97 ± 0.58  |
|                        |                 | 11        | 1.10                                         | 1.37 ± 0.01                                  | 124.98 ± 0.50 |
|                        |                 | 12        | 1.23                                         | 1.27 ± 0.01                                  | 102.80 ± 0.51 |
| Level 3                | 1               | 1         | 2.59                                         | 2.48 ± 0.02                                  | 95.97 ± 0.59  |
|                        |                 | 2         | 2.61                                         | 2.37 ± 0.01                                  | 90.73 ± 0.27  |
|                        |                 | 3         | 2.60                                         | 2.38 ± 0.01                                  | 91.36 ± 0.41  |
|                        | 2               | 4         | 2.36                                         | 2.27 ± 0.01                                  | 96.07 ± 0.43  |
|                        |                 | 5         | 2.36                                         | 2.17 ± 0.02                                  | 91.94 ± 0.72  |
|                        |                 | 6         | 2.34                                         | 2.14 ± 0.01                                  | 91.38 ± 0.22  |
|                        | 3               | 7         | 2.63                                         | 2.52 ± 0.01                                  | 95.84 ± 0.33  |
|                        |                 | 8         | 2.55                                         | 2.28 ± 0.01                                  | 89.49 ± 0.41  |
|                        |                 | 9         | 2.46                                         | 2.21 ± 0.01                                  | 89.93 ± 0.22  |



|  |   |    |      |             |              |
|--|---|----|------|-------------|--------------|
|  | 4 | 10 | 2.56 | 2.54 ± 0.02 | 99.17 ± 0.87 |
|  |   | 11 | 2.51 | 2.30 ± 0.01 | 91.62 ± 0.33 |
|  |   | 12 | 2.57 | 2.31 ± 0.00 | 90.05 ± 0.19 |

**Table S7.** Concentration ( $\mu\text{g g}^{-1}$ ) of natural and labelled compounds for linearity assessment. Uncertainty of the values correspond to the standard deviation of the concentration obtained for 3 replicates.

| Level | L-arginine ( $\mu\text{g g}^{-1}$ ) | $^{15}\text{N}_4$ -arginine ( $\mu\text{g}$ ) | ADMA ( $\mu\text{g g}^{-1}$ ) | $^2\text{H}_7$ -ADMA ( $\mu\text{g}$ ) | SDMA ( $\mu\text{g g}^{-1}$ ) | $^2\text{H}_6$ -SDMA ( $\mu\text{g}$ ) |
|-------|-------------------------------------|-----------------------------------------------|-------------------------------|----------------------------------------|-------------------------------|----------------------------------------|
| N1    | 1.33 ± 0.00                         | 3.55                                          | 0.03 ± 0.00                   | 0.19                                   | 0.05 ± 0.00                   | 0.33                                   |
| N2    | 3.55 ± 0.01                         | 3.45                                          | 0.08 ± 0.00                   | 0.19                                   | 0.14 ± 0.00                   | 0.32                                   |
| N3    | 7.26 ± 0.05                         | 3.53                                          | 0.17 ± 0.00                   | 0.19                                   | 0.27 ± 0.00                   | 0.33                                   |
| N4    | 15.74 ± 0.03                        | 3.49                                          | 0.37 ± 0.00                   | 0.19                                   | 0.88 ± 0.00                   | 0.32                                   |
| N5    | 23.98 ± 0.03                        | 3.57                                          | 0.57 ± 0.00                   | 0.19                                   | 1.56 ± 0.01                   | 0.33                                   |
| N6    | 39.37 ± 0.04                        | 3.61                                          | 0.95 ± 0.01                   | 0.20                                   | 2.54 ± 0.01                   | 0.34                                   |
| N7    | 73.57 ± 0.12                        | 3.65                                          | 1.75 ± 0.01                   | 0.20                                   | 4.81 ± 0.01                   | 0.34                                   |

**Table S8.** Number of injections, concentration ( $\text{ng g}^{-1}$ ), LOD and LOQ of L-Arg, ADMA and SDMA obtained from the measurement of 6 replicates of blank samples. Uncertainty of the values correspond to the standard deviation of the concentration obtained for the replicates indicated.

| Replicates | Injections | Concentration ( $\text{ng g}^{-1}$ ) |             |             |
|------------|------------|--------------------------------------|-------------|-------------|
|            |            | L-Arginine                           | ADMA        | SDMA        |
| 1          | 10         | 37.86 ± 1.03                         | 0.07 ± 0.02 | 0.03 ± 0.01 |
| 2          | 10         | 37.26 ± 0.64                         | 0.06 ± 0.01 | 0.02 ± 0.00 |
| 3          | 10         | 39.88 ± 0.55                         | 0.12 ± 0.02 | 0.02 ± 0.00 |
| 4          | 10         | 34.81 ± 0.75                         | 0.06 ± 0.01 | 0.02 ± 0.01 |

|                   |    |              |             |             |
|-------------------|----|--------------|-------------|-------------|
| 5                 | 10 | 38.11 ± 1.04 | 0.04 ± 0.01 | 0.02 ± 0.00 |
| 6                 | 10 | 39.19 ± 0.77 | 0.05 ± 0.01 | 0.02 ± 0.00 |
| <b>Average</b>    |    | 37.85 ± 1.80 | 0.07 ± 0.03 | 0.02 ± 0.01 |
| <b>LOD (3SD)</b>  |    | 5.41         | 0.09        | 0.02        |
| <b>LOQ (10SD)</b> |    | 18.04        | 0.29        | 0.08        |

**Table S9.** Number of injections, concentration ( $\text{ng g}^{-1}$ ), LOD and LOQ of L-Arg, ADMA and SDMA obtained from the measurement of 3 replicates of low concentration samples. Uncertainty of the values correspond to the standard deviation of the concentration obtained for the replicates indicated.

| Replicates        | Injections | Concentration ( $\text{ng g}^{-1}$ ) |              |              |
|-------------------|------------|--------------------------------------|--------------|--------------|
|                   |            | L-Arginine                           | ADMA         | SDMA         |
| 1                 | 3          | 1325.55 ± 4.98                       | 30.53 ± 0.57 | 48.62 ± 1.34 |
| 2                 | 3          | 1386.18 ± 3.83                       | 30.98 ± 0.40 | 50.80 ± 0.71 |
| 3                 | 3          | 1392.89 ± 1.54                       | 30.69 ± 0.51 | 51.52 ± 0.92 |
| <b>Average</b>    |            | 1368.21 ± 32.29                      | 30.73 ± 0.48 | 50.31 ± 1.58 |
| <b>LOD (3SD)</b>  |            | 96.86                                | 1.43         | 4.75         |
| <b>LOQ (10SD)</b> |            | 322.87                               | 4.76         | 15.83        |

**Figure S7.** 1D-HPLC-MS/MS total ion chromatogram of a 1:5 dilution of a human pooled plasma with PBS containing  $1.37 \mu\text{g g}^{-1}$  of L-Arg,  $0.03 \mu\text{g g}^{-1}$  of ADMA and  $0.05 \mu\text{g g}^{-1}$  of SDMA and spiked with  $3.56 \mu\text{g}$  of  $^{15}\text{N}_4$ -arginine,  $0.19 \mu\text{g}$  of  $^2\text{D}_7$ -ADMA and  $0.33 \mu\text{g}$  of  $^2\text{D}_6$ -SDMA.

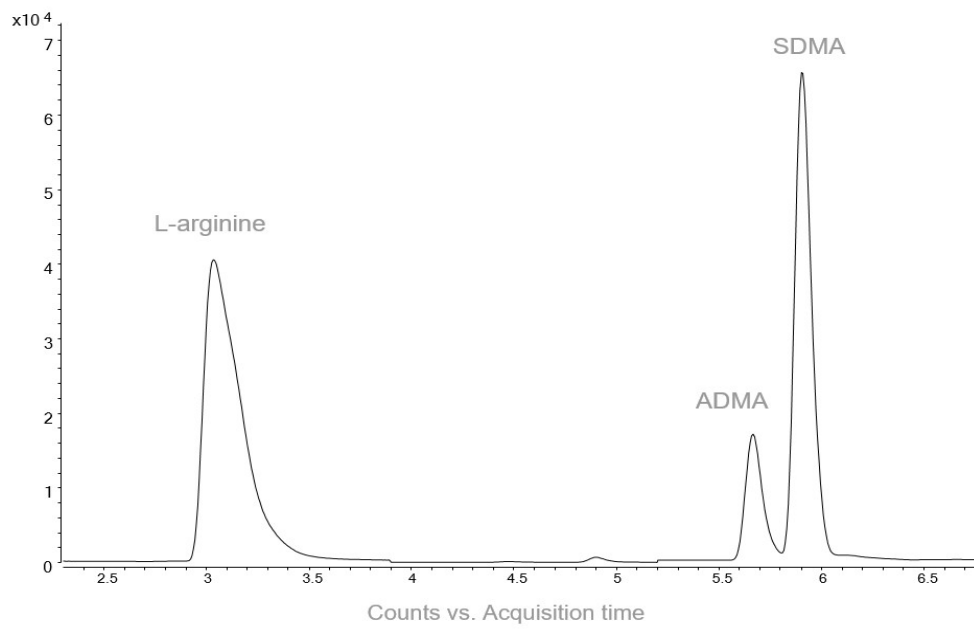

Supplement: d2an01750d1.pdf [file d2an01750d1.pdf]
